# Supplementary material for: Emission of atmospherically significant halocarbons by naturally occurring and farmed tropical macroalgae
Source: Copernicus journal article supplement (doi:10.5194/bg-10-3615-2013), 2013-06-03
Supplement: Supplementary file 1 [file LEEDHAM_suppl_info_1_FWproduction_t24.xls]

## Sheet: introduction
Notes
These production values were calculated during a 24 hour incubation, a full methodology is described in the body of the paper.
They are blank-corrected and production is calculated per gram of fresh biomass and individual incubation time.
Values are in pmol g FW-1 hr-1.
sp. is used where the exact species could not be determined, e.g. Bryopsis sp.
nm = not measured
nd = measured but not detected
All values are the average production rate determined for 2-3 individual incubations

## Sheet: t4 production values
Species	PRODUCTION at t4 (pmol/g FW/hr)
	CH3I	CH2BrCl	CH2Br2	CHBrCl2	CH2ClI	CHBr2Cl	CH2BrI	CHBr3	CH2I2
Gelidium elegans	3.121	2.18109	57.4171	7.15572	2.12559	18.1076	8.28875	294.844	25.1409
Kappaphycus alvarezii	nm	0.144452	121.813	1.98244	0.270399	65.4832	119.066	1731.45	47.7272
Gracilaria changii 1	11.6013	1.66872	1014.39	10.8311	1.57007	326.474	710.721	4461.73	333.31
Gracilaria changii 2	9.36041	0.734638	875.476	8.46828	1.04672	171.992	620.305	4264.5	412.907
Gracilaria salicornia 1	1.39678	0.436182	263.206	2.76661	1.04005	65.3243	365.958	1572.33	393.563
Gracilaria salicornia 2	3.72312	6.14283	382.4	14.192	3.98254	114.279	50.8297	3205.25	74.2746
Padina australis	not measured at t4
Turbinaria conoides	30.2373	0.926704	553.713	8.90856	nd	22.3975	561.777	554.165	501.664
Sargassum baccularia	not measured at t4
Sargassum binderi	3.243	0.287155	140.914	2.30479	0.187056	9.52017	35.8901	118.163	18.1172
Sargassum siliquosum	not measured at t4
Bryopsis sp.	not measured at t4
Caulerpa racemosa	1.13686	nd	2.55222	nd	0.0447715	0.208072	1.65958	3.00216	2.33489
Caulerpa sp.	1.43129	nd	0.359615	nd	0.0181416	0.0567642	0.458753	0.671667	0.389048
Cladophora sp.	0.0771771	0.0246832	13.653	0.0727781	0.0109085	0.598516	0.406408	3.08055	0.46361
Ulva reticulata	0.819634	nd	30.4461	0.426232	0.0693334	9.35741	4.14951	157.086	2.29596
Species	STANDARD DEVIATION (n=2-3) on PRODUCTION VALUES (above)
	CH3I	CH2BrCl	CH2Br2	CHBrCl2	CH2ClI	CHBr2Cl	CH2BrI	CHBr3	CH2I2
Gelidium elegans	0.307298	0.48834	20.3404	1.27646	0.216969	7.0362	2.6154	165.872	4.80859
Kappaphycus alvarezii	nm	0.053018	57.9082	0.887268	0.306877	30.3265	57.7144	335.907	29.8207
Gracilaria changii 1	2.70947	0.407056	93.252	2.1493	0.158642	69.1346	143.639	189.304	232.543
Gracilaria changii 2	3.66139	0.518255	256.285	1.38359	0.302838	16.7193	370.897	477.542	291.942
Gracilaria salicornia 1	0.615565	0.408262	164.913	0.189635	0.734574	13.624	130.646	209.833	130.645
Gracilaria salicornia 2	0.383867	0.638768	36.2925	1.62386	1.29109	12.456	15.1139	577.432	33.7718
Padina australis	not measured at t4
Turbinaria conoides	6.59787	0.282355	130.048	0.840046	nd	3.88415	161.749	105.078	184.483
Sargassum baccularia	not measured at t4
Sargassum binderi	0.757912	0.164943	71.0614	2.25338	0.0704162	5.04587	16.5794	53.4611	5.56085
Sargassum siliquosum	not measured at t4
Bryopsis sp.	not measured at t4
Caulerpa racemosa	0.0400658	0.0235209	4.16311	1.26573	0	0.0492983	0	0	0
Caulerpa sp.	0.0301816	nd	2.72355	nd	0.027952	0.158861	0.244935	1.54103	0.3886
Cladophora sp.	1.07088	nd	0.508572	nd	0.00614542	0.00388523	0.112731	0.297427	0.256418
Ulva reticulata	0.133675	0.0234781	11.3838	0.0655703	0.00232674	0.481164	0.211536	2.11371	0.451775

## Sheet: t24 production values
Species	PRODUCTION at t24 (pmol/g FW/hr)
	CH3I	CH2BrCl	CH2Br2	CHBrCl2	CH2ClI	CHBr2Cl	CH2BrI	CHBr3	CH2I2
Gelidium elegans	1.34685	0.714693	28.6512	1.25595	0.582834	6.11221	1.23277	37.6317	3.19741
Kappaphycus alvarezii	nm	0.284798	226.932	2.0692	0.474365	76.7079	78.3855	512.03	11.4436
Gracilaria changii 1	4.26845	0.101339	85.9973	3.04456	0.218086	100.32	53.5942	1129.07	105.553
Gracilaria changii 2	not measured at t24
Gracilaria salicornia 1	0.434383	0.0844855	78.8586	1.56726	0.119428	52.0077	53.4816	478.439	57.4683
Gracilaria salicornia 2	1.57751	0.493249	35.174	3.25818	0.304548	30.7629	1.92835	595.044	5.04565
Padina australis	11.3113	nd	6.56718	0.681284	0.195407	1.33171	0.984367	8.44787	16.0553
Turbinaria conoides	44.3075	1.01535	251.065	2.93027	5.7389	12.3898	490.458	259.91	485.215
Sargassum baccularia	2.3832	nd	8.59678	0.715956	0.152965	1.49468	1.52135	10.8239	1.78506
Sargassum binderi	2.23204	0.094568	45.4391	3.14536	0.0634854	6.78912	4.5625	45.2554	1.68434
Sargassum siliquosum	7.99603	nd	18.5481	1.27325	0.210841	3.47406	6.67488	36.1447	6.96136
Bryopsis sp.	1.28355	nd	29.3976	0.0101164	0.498052	2.17245	21.511	69.1468	9.17947
Caulerpa racemosa	0.228262	0.00964921	4.35192	nd	0.0256476	0.149623	1.10136	1.44903	1.22165
Caulerpa sp.	1.53919	0.00836218	4.77085	0.0801703	0.0112363	0.411639	0.569847	3.78462	0.363565
Cladophora sp.	0.136098	0.0160793	3.76648	0.103071	0.0287801	0.287094	0.182907	1.442	1.27246
Ulva reticulata	nd	nd	12.7153	0.0854549	0.0078717	1.52346	0.945639	23.5116	0.340142
Species	STANDARD DEVIATION (n=2-3) on PRODUCTION VALUES (above)
	CH3I	CH2BrCl	CH2Br2	CHBrCl2	CH2ClI	CHBr2Cl	CH2BrI	CHBr3	CH2I2
Gelidium elegans	0.470005	0.1247	6.78205	0.522112	0.0338445	2.37382	0.380785	14.7961	1.34741
Kappaphycus alvarezii	nm	0.117502	103.064	1.03028	0.256805	34.1217	47.301	40.7738	6.00933
Gracilaria changii 1	0.898187	0.0605701	34.8872	0.643357	0.0988698	20.5492	24.3214	125.832	27.6493
Gracilaria changii 2	not measured at t24
Gracilaria salicornia 1	0.108145	0.0533739	32.4802	0.284355	0.0549447	13.185	27.8445	560.912	6.5096
Gracilaria salicornia 2	0.355871	0.129002	11.8941	0.241549	0.137415	1.98516	1.06552	277.895	1.68754
Padina australis	10.0935	nd	1.52201	0.531271	0.0129029	0.774966	0.191199	1.21646	10.7895
Turbinaria conoides	5.42783	0.150117	172.805	0.707865	1.15977	3.15615	184.14	87.7266	65.5779
Sargassum baccularia	1.72434	nd	3.22318	0.538959	0.094933	0.705308	0.505245	3.44624	0.49124
Sargassum binderi	1.23789	0.00487298	5.64114	0.866014	0.0234721	0.665069	2.32678	16.4496	1.19175
Sargassum siliquosum	3.91826	nd	2.59805	1.29183	0.00968658	1.09928	1.06273	15.7538	3.57711
Bryopsis sp.	0.807009	nd	5.63638	0.0143067	0.185832	0.108313	10.5654	9.27318	1.47685
Caulerpa racemosa	0.0308019	0.00390449	1.85271	nd	0.00681957	0.0384912	0.131603	0.376307	0.277587
Caulerpa sp.	2.02293	0.0100461	5.95521	0.0846069	0.00149993	0.553871	0.180079	4.68091	0.0895637
Cladophora sp.	0.0427815	0.00178762	1.06509	0.0137776	0.00163099	0.145484	0.0888675	0.30079	0.215261
Ulva reticulata	nd	nd	3.98929	0.0301428	0.00404454	0.396413	0.233335	6.64417	0.048163
