# Supplementary material for: Emission of atmospherically significant halocarbons by naturally occurring and farmed tropical macroalgae
Source: Copernicus journal article supplement (doi:10.5194/bg-10-3615-2013), 2013-06-03
Supplement: Supplementary file 2 [file LEEDHAM_suppl_info_2-3_CHBr3flux.xls]

## Sheet: Suppl. Table 2 - assumptions
Ref	Step	Data source, assumptions, modifications & notes	Value
Section 3.5.1 Determining macroalgal biomass
a	Malaysian & south east Asian (SEA) seaweed biomass distribution	Keng et al. (2013) mean biomass from an annual study at one site in peninsular Malaysia (Port Dickson, see main paper Fig. 1).	Phaeophytes:7.0 kg FW m-2, chlorophytes: 5.2 kg FW m-2, rhodophytes: 0.1 kg FW m-2
Section 3.5.2 Determining regional fluxes and annual emissions
b	Volume of water impacted by seaweed emissions	A wedge of water (see diagram) extending out to 200 m and to a depth of 6 m (supported by Port Dickson biomass surveys) containing 6x105 dm3 of seawater for ever metre of coastline. Seaweed density along the base of this wedge is taken from (a). Technique after Carpenter et al. (2000).
c	Area of Malaysian and SEA coastline where seaweed is found	Total coastal length from WRI (2012). Assumed ~40% of Malaysian coastline could support seaweed and assume this % extends to the whole SEA region. Flux rates covers area out to 200 m as in (b).	7.5x108 m2 (Malaysia) and 1.4 x1010 m2 (SEA)
d	CHBr3 emissions	Average red, brown & green production rates from our study (pmol g FW-1 hr-1) reduced by 60% to account for diel light cycles (Carpenter et al., 2000). Production multiplied by biomass (a).	378 (±61%SD) nmol CHBr3 m-2 hr-2
e	Scenario 1: CHBr3 concentration in coastal seawater	Macroalgae remain constantly submerged and volume of water remains constant (b). Emissions instantly mixed within seawater wedge (b). A loss for tidal flushing assumed from Carpenter et al. (2000) is applied.	755 pmol dm-3
f	Scenario 1: CHBr3 flux	Flux calculated using mean seawater [CHBr3] from (e), mean atmospheric [CHBr3] of 3.2 ppt (0.9-6 ppt) from measurements during the SHIVA campaign, mean 10 ºN-10 ºS latitudinal water temperature of 27 ºC and a mean oceanic surface wind speed of 5.5 m s-1 (Quack & Wallace, 2003) and the procedure described in Johnson (2010). A lower limit estimate.	45 (17-73) nmol CHBr3 m-2 h-1
g	Scenario 1: Annual emission	Scenario 1 flux rate (f) scaled to annual emission and applied to Malaysian and SEA coastal area where seaweed is found (c).	1 (0.3-1.4) Mmol Br yr-1 (Malaysia), 15 (6-27) Mmol Br yr-1 (SEA)
h	Scenario 2: Annual emission	Flux calculations as for Scenario 1 (d-f) but a tidal range of 1.7 m is applied to alter volume of coastal wedge. Seaweeds between 0-50 m from the shore are periodically exposed, increasing flux to atmosphere during this time. Hourly emissions using this varying flux rates are used to calculate a daily and then annual emission for the same area (c) as Scenario 1.	2 Mmol Br yr-1 (Malaysia), 40 Mmol Br yr-1 (SEA)
i	Scenario 3: Annual emission	All mean CHBr3 emissions per square metre reaches the atmosphere with no intermediary step via seawater. Emissions cover same area (c) as Scenarios 1 and 2. An upper limit estimate.	7 (3-12) Mmol Br yr-1 (Malaysia), 140 (53-224) Mmol Br yr-1 (SEA)
Section 3.5.4 Impact of tropical aquaculture
j	Emissions from aquaculture	Current Malaysian farmed biomass and future increases based on: Goh & Lee (2010); Neish (2009) and Phang et al. (2010). Assumes natural emissions are the same as in Section 3.5.3 and these remain constant in the future.	~6000 t potential 6 to 11-fold increases

## Sheet: Suppl. Table 3 - comparison
Study	Geographical region	Oceanic zone	Information source	CHBr3
Seawater concentrations				Seawater concentration / pmol dm-3
Our study	Tropical: Port Dickson, Malaysia	Coastal waters to 200 m, macroalgae area	Based on Malaysian macroalgae incubations and biomass studies (Scenario 1)	755
	Tropical: Port Dickson, Malaysia	Coastal waters	Samples taken over areas containing macroalgae and areas without. Samples were stored for several hours before analysis.	up to ~410
Quack & Wallace (2003)	10-40 °N	Coastal <2 km from coast ("shore")	Review of oceanic and atmospheric measurements, various sources	4 (36-2000)
Carpenter et al. (2000)	Temperate: Mace Head, Ireland	Coastal waters to 200 m, 5-15 m deep, macroalgal area	Site-specific seawater measurements	388 (1σ=166)
		Shelf waters 2-10 km, 20-45 m deep ("offshore")		104 (1σ=12)
Flux rates				Flux to atmosphere / nmol CHBr3 m-2 hr-1
Our study	Tropical	As previous	As previous (Scenario 1-Scenario 3)	17-610
Tegtmeier et al. (2012)	Extratropical and tropical western Pacific	Cruise track (mainly open ocean)	Seawater & atmospheric cruise data	0.5
		Case study "hot spot"		3-5
Quack & Wallace (2003)	Globally averaged	Coastal <2 km from coast ("shore")	As previous	101 (4-430)
		Shelf waters		4.4 (1-40)
	Atlantic	Open ocean		0.4
Butler et al. (2007)a	Tropical	Open ocean	Seawater & atmospheric data from seven cruises	0.4
	Global	All		9 (<-0.1-21)
Carpenter et al. (2009)a	temperate: Atlantic 50-60 °N	coastal	Seawater & atmospheric data from two cruises	10 (5-13)
Annual emissions				Mmol Br yr-1
Our study	Tropical	Malaysia	Bottom-up incubations of macroalgae combined with site-specific biomass study. Scenario 2 with Scenario 1 (min) and 3 (max) in brackets.	2 (0.3-12)
		SEA		40 (6-224)
Warwick et al. (2006)	Tropical/global	All	Model estimates attempting to reproduce observed atmospheric CHBr3 distributions. Their scenario 5 places emission in tropical oceans	7050
Pyle et al. (2011)	Tropical: south east Asia	Coastal	A refinement of Warwick et al. (2006) scenarios updated using regional atmospheric measurements from Borneo	180
		All		350
Carpenter et al. (2009)	Global	Waters to depth of 180 m ("coastal & coastally influenced")	Extrapolation of cruise/site specific measurements	2500
Butler et al. (2007)	Global	All	As previous	10000
		Open ocean		1900
		Coastal	Total marine emissions - open ocean	8100
Palmer & Reason (2009)	Tropical	All	Flux value (above) scaled to estimated area of tropical oceans. Assumes no strong, coastal macroalgae source	4350
Quack & Wallace (2003)	Global	Coastal ("shore")	As previous	2300
Carpenter & Liss (2000)	Global	Coastal	Temperate measurements in macroalgal-rich areas scaled up using estimates of coastal length, fluxes and macroalgae biomass	1600
a: Original value quoted as nmol CHBr3 m-2 d-1, assumption that daily rate constant over 24 hours and converted as such.
b: Scenario 2 (Scenario 1 - Scenario 3)
